# Supplementary material for: Systematic Assessment of Mycobacterium avium Subspecies Paratuberculosis Infections from 1911–2019: A Growth Analysis of Association with Human Autoimmune Diseases
Source: PubMed Central journal article supplement (PMC7465227; doi:10.3390/microorganisms8081212), 2020-08-10
Supplement: microorganisms-08-01212-s001.pdf [file microorganisms-08-01212-s001.pdf]

Table S1: MAP research total citations per country.

| Rank | Country        | TCitations | AACitations |
|------|----------------|------------|-------------|
| 1    | USA            | 26418      | 29.78       |
| 2    | United Kingdom | 7723       | 40.22       |
| 3    | Australia      | 6014       | 25.48       |
| 4    | Canada         | 3875       | 19.47       |
| 5    | Ireland        | 2942       | 28.02       |
| 6    | Spain          | 2914       | 25.79       |
| 7    | Netherlands    | 2767       | 30.41       |
| 8    | Germany        | 2373       | 12.97       |
| 9    | Denmark        | 2344       | 28.59       |
| 10   | New Zealand    | 2205       | 23.46       |
| 11   | France         | 1680       | 23.01       |
| 12   | Czech Republic | 1679       | 27.52       |
| 13   | Italy          | 1634       | 13.07       |
| 14   | India          | 1328       | 6.51        |
| 15   | Belgium        | 1039       | 25.34       |
| 16   | Norway         | 1004       | 22.82       |
| 17   | Japan          | 839        | 16.78       |
| 18   | Switzerland    | 517        | 19.88       |
| 19   | Brazil         | 439        | 6.65        |
| 20   | Sweden         | 436        | 27.25       |

TC (total citations); AAC (average article citations); Average Growth Rate (AGR); Average Documents per Year (ADY); percentage document per last 3 years (PDLY)

Table S2: Growth of MAP research in relation to 52 scientific subject areas.

| R  | subject                                     | articles | % of 3889 | AGR       | ADY  | PDLY | h-index |
|----|---------------------------------------------|----------|-----------|-----------|------|------|---------|
| 1  | Veterinary Sciences                         | 1450     | 37.28     | -370      | 48   | 9.9  | 67      |
| 2  | Microbiology                                | 702      | 18.05     | -230      | 20   | 8.5  | 72      |
| 3  | Immunology                                  | 373      | 9.59      | <b>30</b> | 13.3 | 10.7 | 45      |
| 4  | Agriculture                                 | 336      | 8.64      | <b>30</b> | 25.7 | 22.9 | 35      |
| 5  | Food Science & Technology                   | 234      | 6.02      | <b>70</b> | 16.7 | 21.4 | 40      |
| 6  | Infectious Diseases                         | 181      | 4.65      | -170      | 4    | 6.6  | 40      |
| 7  | Biotechnology & Applied Microbiology        | 175      | 4.50      | -170      | 7    | 12   | 45      |
| 8  | Biochemistry & Molecular Biology            | 92       | 2.37      | -70       | 5.3  | 17.4 | 25      |
| 9  | Science & Technology - Other Topics         | 90       | 2.31      | -300      | 8.3  | 27.8 | 23      |
| 10 | Gastroenterology & Hepatology               | 73       | 1.88      | -30       | 1.3  | 5.5  | 33      |
| 11 | Pathology                                   | 52       | 1.34      | <b>30</b> | 0.7  | 3.8  | 25      |
| 12 | Research & Experimental Medicine            | 41       | 1.05      | <b>30</b> | 1.3  | 9.8  | 18      |
| 13 | Genetics & Heredity                         | 37       | 0.95      | 0         | 2    | 16.2 | 16      |
| 14 | Cell Biology                                | 27       | 0.69      | -30       | 0.7  | 7.4  | 17      |
| 15 | Public, Environmental & Occupational Health | 21       | 0.54      | -130      | 0.3  | 4.8  | 12      |
| 16 | Life Sciences & Biomedicine - Other Topics  | 19       | 0.49      | 0         | 1.3  | 21.1 | 8       |
| 17 | Zoology                                     | 14       | 0.36      | -30       | 0.7  | 14.3 | 5       |
| 18 | Chemistry                                   | 13       | 0.33      | 0         | 0.7  | 15.4 | 6       |
| 19 | Neurosciences & Neurology                   | 12       | 0.31      | -70       | 1    | 25   | 6       |
| 20 | General & Internal Medicine                 | 8        | 0.21      | -30       | 0.7  | 25   | 4       |
| 21 | Mathematical & Computational Biology        | 8        | 0.21      | 0         | 0.7  | 25   | 5       |
| 22 | Pharmacology & Pharmacy                     | 8        | 0.21      | 0         | 0.3  | 12.5 | 6       |
| 23 | Reproductive Biology                        | 7        | 0.18      | 0         | 0.3  | 14.3 | 4       |
| 24 | Engineering                                 | 5        | 0.13      | 0         | 0.3  | 20   | 4       |
| 25 | Environmental Sciences & Ecology            | 5        | 0.13      | 0         | 0    | 0    | 4       |
| 26 | Respiratory System                          | 5        | 0.13      | -30       | 0.7  | 40   | 3       |
| 27 | Hematology                                  | 4        | 0.10      | 0         | 0    | 0    | 4       |
| 28 | Biophysics                                  | 3        | 0.08      | 0         | 0.3  | 33.3 | 2       |
| 29 | Entomology                                  | 3        | 0.08      | 0         | 0    | 0    | 3       |
| 30 | Instruments & Instrumentation               | 3        | 0.08      | 0         | 0.3  | 33.3 | 2       |
| 31 | Medical Laboratory Technology               | 3        | 0.08      | 0         | 0    | 0    | 2       |
| 32 | Business & Economics                        | 2        | 0.05      | 0         | 0    | 0    | 2       |
| 33 | Mathematics                                 | 2        | 0.05      | 0         | 0    | 0    | 2       |
| 34 | Parasitology                                | 2        | 0.05      | 0         | 0.3  | 50   | 0       |
| 35 | Tropical Medicine                           | 2        | 0.05      | 0         | 0.3  | 50   | 0       |
| 36 | Virology                                    | 2        | 0.05      | 0         | 0    | 0    | 1       |
| 37 | Water Resources                             | 2        | 0.05      | 0         | 0    | 0    | 2       |
| 38 | Biodiversity & Conservation                 | 1        | 0.03      | 0         | 0    | 0    | 1       |
| 39 | Electrochemistry                            | 1        | 0.03      | 0         | 0.3  | 100  | 1       |
| 40 | Evolutionary Biology                        | 1        | 0.03      | 0         | 0    | 0    | 1       |
| 41 | Fisheries                                   | 1        | 0.03      | 0         | 0    | 0    | 1       |

|    |                                         |   |      |   |     |     |   |
|----|-----------------------------------------|---|------|---|-----|-----|---|
| 42 | Mathematical Methods In Social Sciences | 1 | 0.03 | 0 | 0   | 0   | 1 |
| 43 | Nuclear Science & Technology            | 1 | 0.03 | 0 | 0   | 0   | 1 |
| 44 | Nutrition & Dietetics                   | 1 | 0.03 | 0 | 0   | 0   | 1 |
| 45 | Oncology                                | 1 | 0.03 | 0 | 0.3 | 100 | 1 |
| 46 | Paediatrics                             | 1 | 0.03 | 0 | 0   | 0   | 1 |
| 47 | Physics                                 | 1 | 0.03 | 0 | 0   | 0   | 1 |
| 48 | Physiology                              | 1 | 0.03 | 0 | 0   | 0   | 1 |
| 49 | Rheumatology                            | 1 | 0.03 | 0 | 0.3 | 100 | 1 |
| 50 | Spectroscopy                            | 1 | 0.03 | 0 | 0   | 0   | 1 |
| 51 | Surgery                                 | 1 | 0.03 | 0 | 0   | 0   | 1 |
| 52 | Toxicology                              | 1 | 0.03 | 0 | 0   | 0   | 1 |

Average Growth Rate (AGR); Average Documents per Year (ADY); percentage document per last 3 years (PDLY)

Table S3: MAP research growth by country from 2017 – 2019.

| Country        | Articles | % of 3889 | AGR%       | ADY  | PDLY | h-index |
|----------------|----------|-----------|------------|------|------|---------|
| United States  | 965      | 24.81     | <b>30</b>  | 26   | 8.1  | 71      |
| Australia      | 267      | 6.87      | 0          | 9    | 10.1 | 45      |
| United Kingdom | 240      | 6.17      | -330       | 8    | 10   | 48      |
| India          | 228      | 5.86      | -430       | 13   | 17.1 | 25      |
| Canada         | 223      | 5.73      | -330       | 13   | 17.5 | 36      |
| Germany        | 180      | 4.63      | <b>170</b> | 10.7 | 17.8 | 26      |
| Italy          | 139      | 3.57      | -170       | 10.3 | 22.3 | 23      |
| Netherlands    | 136      | 3.50      | -70        | 4.3  | 9.6  | 41      |
| Spain          | 129      | 3.32      | <b>100</b> | 6.7  | 15.5 | 34      |
| New Zealand    | 106      | 2.73      | 0          | 2.3  | 6.6  | 22      |
| Denmark        | 90       | 2.31      | -130       | 1.7  | 5.6  | 30      |
| France         | 72       | 1.85      | -30        | 3.7  | 15.3 | 19      |
| Czech Republic | 71       | 1.83      | -30        | 1.3  | 5.6  | 23      |
| Ireland        | 66       | 1.70      | 0          | 5.7  | 25.8 | 16      |
| North Ireland  | 63       | 1.62      | -70        | 3.3  | 15.9 | 28      |
| Iran           | 60       | 1.54      | -30        | 5.3  | 26.7 | 7       |
| Brazil         | 57       | 1.47      | -30        | 3.7  | 19.3 | 12      |
| South Korea    | 51       | 1.31      | -30        | 4    | 23.5 | 12      |
| Japan          | 46       | 1.18      | -100       | 1.3  | 8.7  | 16      |
| Argentina      | 45       | 1.16      | -100       | 1.3  | 8.9  | 10      |
| Egypt          | 45       | 1.16      | <b>170</b> | 5    | 33.3 | 11      |
| Norway         | 43       | 1.11      | 0          | 0    | 0    | 18      |
| Austria        | 39       | 1.00      | 0          | 2.7  | 20.5 | 11      |
| Belgium        | 37       | 0.95      | 0          | 1    | 8.1  | 19      |
| Chile          | 37       | 0.95      | <b>70</b>  | 2.7  | 21.6 | 13      |
| Greece         | 34       | 0.87      | -70        | 0.7  | 5.9  | 13      |

|              |    |      |           |     |      |    |
|--------------|----|------|-----------|-----|------|----|
| Switzerland  | 25 | 0.64 | <b>30</b> | 0.7 | 8    | 11 |
| Turkey       | 25 | 0.64 | -30       | 1.7 | 20   | 6  |
| Portugal     | 22 | 0.57 | -30       | 1.7 | 22.7 | 7  |
| South Africa | 22 | 0.57 | 0         | 0.7 | 9.1  | 13 |
| Poland       | 21 | 0.54 | <b>30</b> | 1   | 14.3 | 3  |
| Saudi Arabia | 21 | 0.54 | <b>70</b> | 1   | 14.3 | 7  |
| Colombia     | 19 | 0.49 | 0         | 1.7 | 26.3 | 6  |
| Mexico       | 19 | 0.49 | -30       | 0.7 | 10.5 | 6  |
| Sweden       | 19 | 0.49 | 0         | 0   | 0    | 14 |
| China        | 18 | 0.46 | 0         | 2.7 | 44.4 | 7  |
| Hungary      | 16 | 0.41 | 0         | 0.3 | 6.2  | 5  |
| Israel       | 15 | 0.39 | 0         | 0.3 | 6.7  | 8  |
| Pakistan     | 13 | 0.33 | 0         | 1.7 | 38.5 | 3  |
| Taiwan       | 9  | 0.23 | 0         | 0   | 0    | 7  |
| Jordan       | 8  | 0.21 | 0         | 0   | 0    | 5  |
| Slovakia     | 8  | 0.21 | 0         | 0   | 0    | 6  |
| Cyprus       | 7  | 0.18 | -30       | 0.3 | 14.3 | 6  |
| Iceland      | 6  | 0.15 | 0         | 0   | 0    | 4  |
| Malaysia     | 6  | 0.15 | 0         | 0.3 | 16.7 | 4  |
| Bhutan       | 5  | 0.13 | 0         | 0.7 | 40   | 4  |
| Venezuela    | 5  | 0.13 | 0         | 0   | 0    | 2  |
| Finland      | 4  | 0.10 | 0         | 0   | 0    | 4  |
| Sudan        | 4  | 0.10 | 0         | 0   | 0    | 2  |
| Thailand     | 4  | 0.10 | <b>70</b> | 1   | 75   | 1  |
| Uganda       | 4  | 0.10 | 0         | 0.3 | 25   | 3  |
| Uruguay      | 4  | 0.10 | <b>70</b> | 1   | 75   | 2  |
| Slovenia     | 3  | 0.08 | 0         | 0   | 0    | 2  |
| Albania      | 2  | 0.05 | 0         | 0   | 0    | 0  |
| Algeria      | 2  | 0.05 | <b>30</b> | 0.3 | 50   | 1  |
| Bulgaria     | 2  | 0.05 | <b>70</b> | 0.7 | 100  | 0  |
| Croatia      | 2  | 0.05 | 0         | 0   | 0    | 0  |
| Iraq         | 2  | 0.05 | 0         | 0.3 | 50   | 1  |
| Kuwait       | 2  | 0.05 | -70       | 0   | 0    | 1  |
| Peru         | 2  | 0.05 | 0         | 0   | 0    | 1  |
| Philippines  | 2  | 0.05 | 0         | 0.7 | 100  | 1  |

Average Growth Rate (AGR); Average Documents per Year (ADY); percentage document per last 3 years (PDLY)

Table S4: Growth of MAP research based on institutional participations in the last 3 years.

| S/n | Institution with country                | Total | % of 3889 | AGR       | ADY | PDLY | h-index |
|-----|-----------------------------------------|-------|-----------|-----------|-----|------|---------|
| 1   | Univ Sydney, Australia                  | 85    | 2.19      | <b>30</b> | 5.3 | 18.8 | 21      |
| 2   | Coll Vet Med, United States             | 78    | 2.01      | 0         | 0   | 0    | 34      |
| 3   | Univ Wisconsin, United States           | 78    | 2.01      | -30       | 3.3 | 12.8 | 20      |
| 4   | Sch Vet Med, United States              | 76    | 1.95      | 0         | 0   | 0    | 34      |
| 5   | USDA ARS, United States                 | 63    | 1.62      | 0         | 4   | 19   | 18      |
| 6   | Univ Minnesota, United States           | 61    | 1.57      | <b>30</b> | 1.7 | 8.2  | 20      |
| 7   | Cornell Univ, United States             | 60    | 1.54      | -70       | 3.3 | 16.7 | 22      |
| 8   | Univ Calgary, Canada                    | 51    | 1.31      | -230      | 4   | 23.5 | 17      |
| 9   | Univ Guelph, Canada                     | 48    | 1.23      | -130      | 5.7 | 35.4 | 15      |
| 10  | Natl Anim Dis Ctr, United States        | 47    | 1.21      | 0         | 0   | 0    | 28      |
| 11  | ARS, United States                      | 46    | 1.18      | 0         | 2.7 | 17.4 | 18      |
| 12  | Cent Inst Res Goats, India              | 46    | 1.18      | -200      | 3.7 | 23.9 | 13      |
| 13  | Univ Sassari, Italy                     | 46    | 1.18      | -200      | 3.7 | 23.9 | 14      |
| 14  | Univ Penn, United States                | 39    | 1.00      | -100      | 0.3 | 2.6  | 20      |
| 15  | Vet Res Inst, Czech Republic            | 38    | 0.98      | -30       | 1.3 | 10.5 | 14      |
| 16  | Univ Copenhagen, Denmark                | 36    | 0.93      | -130      | 0.7 | 5.6  | 16      |
| 17  | Iowa State Univ, United States          | 33    | 0.85      | -70       | 1.3 | 12.1 | 11      |
| 18  | Moredu Res Inst, United Kingdom         | 33    | 0.85      | -100      | 1.3 | 12.1 | 16      |
| 19  | Univ Utrecht, Netherlands               | 33    | 0.85      | -30       | 0.3 | 3    | 18      |
| 20  | Indian Vet Res Inst, India              | 32    | 0.82      | -230      | 2.7 | 25   | 6       |
| 21  | Fac Vet Sci, Australia                  | 31    | 0.80      | 0         | 0   | 0    | 19      |
| 22  | NEIKER Tecnalia, Spain                  | 29    | 0.75      | -70       | 1   | 10.3 | 13      |
| 23  | Elizabeth Macarthur Agr Inst, Australia | 28    | 0.72      | 0         | 0   | 0    | 19      |
| 24  | Univ Giessen, Germany                   | 25    | 0.64      | -100      | 0   | 0    | 10      |
| 25  | Washington State Univ, United States    | 25    | 0.64      | <b>30</b> | 2   | 24   | 14      |
| 26  | Penn State Univ, United States          | 24    | 0.62      | 0         | 1.7 | 20.8 | 11      |
| 27  | Michigan State Univ, United States      | 23    | 0.59      | <b>30</b> | 1.7 | 21.7 | 11      |
| 28  | Univ Austral Chile, Chile               | 23    | 0.59      | 0         | 2   | 26.1 | 8       |
| 29  | Massey Univ, New Zealand                | 21    | 0.54      | -30       | 0.7 | 9.5  | 10      |
| 30  | Texas A&M Univ, United States           | 21    | 0.54      | -30       | 0   | 0    | 7       |
| 31  | Univ Coll Dublin, Ireland               | 21    | 0.54      | <b>30</b> | 2.7 | 38.1 | 10      |
| 32  | Univ Otago, New Zealand                 | 21    | 0.54      | 0         | 0.7 | 9.5  | 10      |
| 33  | Univ Prince Edward Isl, Canada          | 21    | 0.54      | -30       | 1.7 | 23.8 | 11      |
| 34  | Dept Anim Sci, United States            | 20    | 0.51      | 0         | 0   | 0    | 15      |
| 35  | Univ Calif Davis, United States         | 20    | 0.51      | <b>30</b> | 1   | 15   | 9       |
| 36  | Univ Tennessee, United States           | 20    | 0.51      | -70       | 0.7 | 10   | 11      |
| 37  | Queens Univ Belfast, North Ireland      | 19    | 0.49      | -30       | 2   | 31.6 | 11      |
| 38  | Univ Pretoria, South Africa             | 19    | 0.49      | 0         | 0.3 | 5.3  | 12      |
| 39  | Dept Microbiol, United States           | 18    | 0.46      | 0         | 0   | 0    | 16      |
| 40  | INRA, France                            | 18    | 0.46      | 0         | 1   | 16.7 | 10      |
| 41  | New Bolton Ctr, United States           | 18    | 0.46      | 0         | 0   | 0    | 15      |
| 42  | Shiraz Univ, Iran                       | 18    | 0.46      | <b>70</b> | 3.7 | 61.1 | 4       |
| 43  | Tech Univ Denmark, Denmark              | 18    | 0.46      | -70       | 1   | 16.7 | 9       |

|    |                                                         |    |      |      |     |      |    |
|----|---------------------------------------------------------|----|------|------|-----|------|----|
| 44 | Univ Vet Med Hannover, Germany                          | 18 | 0.46 | 0    | 1   | 16.7 | 7  |
| 45 | AgResearch, New Zealand                                 | 17 | 0.44 | 30   | 1   | 17.6 | 10 |
| 46 | CS-62132 Brno, Czech Republic                           | 17 | 0.44 | 0    | 0   | 0    | 13 |
| 47 | Cairo Univ, Egypt                                       | 17 | 0.44 | 0    | 1   | 17.6 | 7  |
| 48 | Friedrich Loeffler Inst, Germany                        | 17 | 0.44 | -30  | 1.3 | 23.5 | 8  |
| 49 | USDA, United States                                     | 17 | 0.44 | -30  | 0   | 0    | 11 |
| 50 | Atlantic Vet Coll, Canada                               | 16 | 0.41 | 0    | 0   | 0    | 14 |
| 51 | Fac Vet, Spain                                          | 16 | 0.41 | 0    | 0   | 0    | 14 |
| 52 | GLA Univ, India                                         | 15 | 0.39 | -30  | 3.3 | 66.7 | 3  |
| 53 | Orange, Australia                                       | 15 | 0.39 | 0    | 0   | 0    | 13 |
| 54 | Wageningen Univ, Netherlands                            | 15 | 0.39 | 70   | 1.7 | 33.3 | 8  |
| 55 | NL-7400 AA Deventer, Netherlands                        | 14 | 0.36 | 0    | 0   | 0    | 11 |
| 56 | Univ Florida, United States                             | 14 | 0.36 | 30   | 0.3 | 7.1  | 8  |
| 57 | Univ Montreal, Canada                                   | 14 | 0.36 | 0    | 2   | 42.9 | 6  |
| 58 | Univ Pisa, Italy                                        | 14 | 0.36 | 0    | 2.7 | 57.1 | 5  |
| 59 | Amity Univ Rajasthan, India                             | 13 | 0.33 | -130 | 1.7 | 38.5 | 4  |
| 60 | Sch Med, United Kingdom                                 | 13 | 0.33 | 0    | 0   | 0    | 11 |
| 61 | Seoul Natl Univ, South Korea                            | 13 | 0.33 | -70  | 1.7 | 38.5 | 6  |
| 62 | TEAGASC, Ireland                                        | 13 | 0.33 | 30   | 1.7 | 38.5 | 5  |
| 63 | Univ Fed Vicosa, Brazil                                 | 13 | 0.33 | -70  | 1   | 23.1 | 5  |
| 64 | Univ Nebraska, United States                            | 13 | 0.33 | 0    | 0.3 | 7.7  | 8  |
| 65 | Univ Nottingham, United Kingdom                         | 13 | 0.33 | -170 | 1   | 23.1 | 7  |
| 66 | Anim Dis Diagnost Lab, United States                    | 12 | 0.31 | 0    | 0   | 0    | 10 |
| 67 | Biomed Genom Ctr, United States                         | 12 | 0.31 | 0    | 0   | 0    | 11 |
| 68 | Cork Inst Technol, Ireland                              | 12 | 0.31 | -30  | 1   | 25   | 7  |
| 69 | Dept Med, United States                                 | 12 | 0.31 | 0    | 0   | 0    | 11 |
| 70 | Dept Vet Pathobiol, United States                       | 12 | 0.31 | 0    | 0   | 0    | 12 |
| 71 | Fac Vet Med, Netherlands                                | 12 | 0.31 | 0    | 0   | 0    | 10 |
| 72 | Univ Cagliari, Italy                                    | 12 | 0.31 | -100 | 0   | 0    | 9  |
| 73 | Univ Leon, Spain                                        | 12 | 0.31 | -30  | 1   | 25   | 7  |
| 74 | Anim Hlth Ireland, Ireland                              | 11 | 0.28 | 70   | 2.3 | 63.6 | 4  |
| 75 | Colorado State Univ, United States                      | 11 | 0.28 | 0    | 0   | 0    | 7  |
| 76 | Dept Food Sci Food Microbiol, North Ireland             | 11 | 0.28 | 0    | 0   | 0    | 11 |
| 77 | Dept Pathobiol Sci, United States                       | 11 | 0.28 | 0    | 0   | 0    | 10 |
| 78 | Dept Vet & Biomed Sci, United States                    | 11 | 0.28 | 0    | 0   | 0    | 9  |
| 79 | Fed Res Inst Anim Hlth, Germany                         | 11 | 0.28 | -30  | 1   | 27.3 | 8  |
| 80 | GD Anim Hlth Serv, Netherlands                          | 11 | 0.28 | -30  | 1   | 27.3 | 5  |
| 81 | Inst Mikrobiol & Tierseuchen, Germany                   | 11 | 0.28 | 0    | 0   | 0    | 7  |
| 82 | Ist Zooprofilatt Sperimentale Lombardia & Emilia, Italy | 11 | 0.28 | 30   | 1.3 | 36.4 | 5  |
| 83 | Univ Antioquia, Colombia                                | 11 | 0.28 | 30   | 1   | 27.3 | 6  |
| 84 | Univ Complutense Madrid, Spain                          | 11 | 0.28 | 30   | 1   | 27.3 | 6  |
| 85 | Univ Glasgow, United Kingdom                            | 11 | 0.28 | -100 | 1   | 27.3 | 5  |
| 86 | Univ Missouri, United States                            | 11 | 0.28 | -30  | 0.7 | 18.2 | 8  |
| 87 | Univ Thessaly, Greece                                   | 11 | 0.28 | -70  | 0.3 | 9.1  | 6  |
| 88 | Coll Vet Med & Biomed Sci, United States                | 10 | 0.26 | 0    | 0   | 0    | 9  |

|    |                                          |    |      |      |     |    |   |
|----|------------------------------------------|----|------|------|-----|----|---|
| 89 | Dept Anim Sci & Anim Hlth, Denmark       | 10 | 0.26 | 0    | 0   | 0  | 9 |
| 90 | Dept Mol Biol & Microbiol, United States | 10 | 0.26 | 0    | 0   | 0  | 9 |
| 91 | Div Pathol, India                        | 10 | 0.26 | 0    | 0   | 0  | 8 |
| 92 | King Faisal Univ, Saudi Arabia           | 10 | 0.26 | 30   | 0.7 | 20 | 4 |
| 93 | Natl Inst Anim Hlth, Japan               | 10 | 0.26 | -70  | 0.3 | 10 | 6 |
| 94 | SERIDA, Spain                            | 10 | 0.26 | 70   | 1.3 | 40 | 6 |
| 95 | Thuringian Anim Dis Fund, Germany        | 10 | 0.26 | -100 | 1   | 30 | 6 |
| 96 | Univ Illinois, United States             | 10 | 0.26 | -100 | 1.7 | 50 | 6 |
| 97 | Univ Saskatchewan, Canada                | 10 | 0.26 | -70  | 0.3 | 10 | 8 |
| 98 | Western Coll Vet Med, Canada             | 10 | 0.26 | 0    | 0   | 0  | 8 |
| 99 | N-0033 Oslo, Norway                      | 9  | 0.23 | 0    | 0   | 0  | 7 |

Average Growth Rate (AGR); Average Documents per Year (ADY); percentage document per last 3 years (PDLY).
